# Supplementary material for: Trypanosoma rangeli Genetic, Mammalian Hosts, and Geographical Diversity from Five Brazilian Biomes
Source: MDPI journal article supplement (doi:10.3390/pathogens10060736), 2021-06-10

Table S1: *Trypanosoma rangeli* infection in different mammalian species in Brazilian biomes.

| Sample ID | Host                          | Year | Biome                             | SSU rDNA            | GenBank accession number |
|-----------|-------------------------------|------|-----------------------------------|---------------------|--------------------------|
| C01       | <i>Didelphis albiventris</i>  | 2005 | CE/Caatinga                       | <i>T. rangeli</i> A | MN648976                 |
| C140      | <i>Nasua nasua</i>            | 2009 | MS/Pantanal                       | <i>T. rangeli</i> A | MN648980                 |
| C167      | <i>Didelphis marsupialis</i>  | 2009 | PA/Amazon                         | <i>T. rangeli</i> A | MN649025                 |
| C375      | <i>Sapajus libidinosus</i>    | 2011 | MA/Amazon-Cerrado transition area | <i>T. rangeli</i> A | MN648994                 |
| C376      | <i>Sapajus libidinosus</i>    | 2011 | MA/Amazon-Cerrado transition area | <i>T. rangeli</i> A | MN648995                 |
| C377      | <i>Sapajus libidinosus</i>    | 2011 | MA/Amazon-Cerrado transition area | <i>T. rangeli</i> A | MN648996                 |
| C379      | <i>Sapajus libidinosus</i>    | 2011 | MA/Amazon-Cerrado transition area | <i>T. rangeli</i> A | MN648997                 |
| C381      | <i>Sapajus libidinosus</i>    | 2011 | MA/Amazon-Cerrado transition area | <i>T. rangeli</i> A | MN648998                 |
| C382      | <i>Sapajus libidinosus</i>    | 2011 | MA/Amazon-Cerrado transition area | <i>T. rangeli</i> A | MN648999                 |
| C383      | <i>Sapajus libidinosus</i>    | 2011 | MA/Amazon-Cerrado transition area | <i>T. rangeli</i> A | MN649000                 |
| C384      | <i>Sapajus libidinosus</i>    | 2011 | MA/Amazon-Cerrado transition area | <i>T. rangeli</i> A | MN649001                 |
| C386      | <i>Coendou prehensilis</i>    | 2011 | MA/Amazon-Cerrado transition area | <i>T. rangeli</i> A | MN649002                 |
| C390      | <i>Sapajus libidinosus</i>    | 2011 | MA/Amazon-Cerrado transition area | <i>T. rangeli</i> A | MN649004                 |
| C391      | <i>Sapajus libidinosus</i>    | 2011 | MA/Amazon-Cerrado transition area | <i>T. rangeli</i> A | MN649005                 |
| C392      | <i>Sapajus libidinosus</i>    | 2011 | MA/Amazon-Cerrado transition area | <i>T. rangeli</i> A | MN649006                 |
| C393      | <i>Sapajus libidinosus</i>    | 2011 | MA/Amazon-Cerrado transition area | <i>T. rangeli</i> A | MN649007                 |
| C402      | <i>Sapajus libidinosus</i>    | 2011 | MA/Amazon-Cerrado transition area | <i>T. rangeli</i> A | MN649008                 |
| C587      | <i>Carollia perspicillata</i> | 2014 | AC/Amazon                         | <i>T. rangeli</i> A | KY649114 <sup>a</sup>    |
| C750      | <i>Canis familiaris</i>       | 2017 | AC/Amazon                         | <i>T. rangeli</i> A | MN649017                 |
| C77       | <i>Nasua nasua</i>            | 2009 | MS/Pantanal                       | <i>T. rangeli</i> B | MN648977                 |
| C85       | <i>Nasua nasua</i>            | 2009 | MS/Pantanal                       | <i>T. rangeli</i> B | MN648978                 |
| C93       | <i>Nasua nasua</i>            | 2009 | MS/Pantanal                       | <i>T. rangeli</i> B | MN649021                 |
| C97       | <i>Nasua nasua</i>            | 2009 | MS/Pantanal                       | <i>T. rangeli</i> B | MN649023                 |
| C98       | <i>Nasua nasua</i>            | 2009 | MS/Pantanal                       | <i>T. rangeli</i> B | MN649024                 |
| C129      | <i>Nasua nasua</i>            | 2009 | MS/Pantanal                       | <i>T. rangeli</i> B | MN648979                 |
| C146      | <i>Nasua nasua</i>            | 2009 | MS/Pantanal                       | <i>T. rangeli</i> B | MN649027                 |
| C148      | <i>Nasua nasua</i>            | 2009 | MS/Pantanal                       | <i>T. rangeli</i> B | MN648981                 |
| C179      | <i>Nasua nasua</i>            | 2007 | MS/Pantanal                       | <i>T. rangeli</i> B | MN648982                 |
| C185      | <i>Nasua nasua</i>            | 2009 | MS/Pantanal                       | <i>T. rangeli</i> B | MN648983                 |
| C210      | <i>Nasua nasua</i>            | 2010 | MS/Pantanal                       | <i>T. rangeli</i> B | MN648984                 |

|                   |                                 |      |                                   |                     |                       |
|-------------------|---------------------------------|------|-----------------------------------|---------------------|-----------------------|
| C212              | <i>Nasua nasua</i>              | 2010 | MS/Pantanal                       | <i>T. rangeli</i> B | MN648985              |
| C286              | <i>Nasua nasua</i>              | 2006 | MS/Pantanal                       | <i>T. rangeli</i> B | MN648986              |
| C296              | <i>Nasua nasua</i>              | 2006 | MS/Pantanal                       | <i>T. rangeli</i> B | MN648987              |
| C299              | <i>Nasua nasua</i>              | 2008 | MS/Pantanal                       | <i>T. rangeli</i> B | MN648988              |
| C342              | <i>Nasua nasua</i>              | 2008 | MS/Pantanal                       | <i>T. rangeli</i> B | MN648989              |
| C359              | <i>Nasua nasua</i>              | 2011 | MS/Pantanal                       | <i>T. rangeli</i> B | MN648990              |
| C372              | <i>Alouatta belzebul</i>        | 2011 | MA/Amazon-Cerrado transition area | <i>T. rangeli</i> B | MN648991              |
| C373              | <i>Alouatta caraya</i>          | 2011 | MA/Amazon-Cerrado transition area | <i>T. rangeli</i> B | MN648992              |
| C374              | <i>Sapajus libidinosus</i>      | 2011 | MA/Amazon-Cerrado transition area | <i>T. rangeli</i> B | MN648993              |
| C389              | <i>Sapajus libidinosus</i>      | 2011 | MA/Amazon-Cerrado transition area | <i>T. rangeli</i> B | MN649003              |
| C710              | <i>Saguinus bicolor bicolor</i> | 2016 | AM/Amazon                         | <i>T. rangeli</i> B | MN649011              |
| C711              | <i>Nasua nasua</i>              | 2016 | MS/Pantanal                       | <i>T. rangeli</i> B | MN649012              |
| C713              | <i>Nasua nasua</i>              | 2016 | MS/Pantanal                       | <i>T. rangeli</i> B | MN649013              |
| C714              | <i>Nasua nasua</i>              | 2016 | MS/Pantanal                       | <i>T. rangeli</i> B | MN649014              |
| C721              | <i>Nasua nasua</i>              | 2016 | MS/Pantanal                       | <i>T. rangeli</i> B | MN649016              |
| RM2028            | <i>Carollia perspicillata</i>   | 2015 | ES/Atlantic Forest                | <i>T. rangeli</i> B | MF141861 <sup>a</sup> |
| C593              | <i>Carollia perspicillata</i>   | 2014 | ES/Atlantic Forest                | <i>T. rangeli</i> D | MF141848 <sup>a</sup> |
| C636              | <i>Trinomys dimidiatus</i>      | 2015 | RJ/Atlantic Forest                | <i>T. rangeli</i> D | MN649009              |
| C637              | <i>Didelphis aurita</i>         | 2015 | RJ/Atlantic Forest                | <i>T. rangeli</i> D | MN649010              |
| C94               | <i>Canis familiaris</i>         | 2009 | PA/Amazon                         | <i>T. rangeli</i> E | MN649022              |
| C170              | <i>Philander opossum</i>        | 2008 | PA/Amazon                         | <i>T. rangeli</i> E | MN649026              |
| C720              | <i>Procyon cancrivorus</i>      | 2016 | MS/Pantanal                       | <i>T. rangeli</i> E | MN649015              |
| C752 <sup>b</sup> | <i>Priodontes maximus</i>       | 2017 | MS/Pantanal                       | <i>T. rangeli</i> E | MN649018              |
| C776 <sup>b</sup> | <i>Priodontes maximus</i>       | 2017 | MS/Pantanal                       | <i>T. rangeli</i> E | MN649019              |
| C792 <sup>b</sup> | <i>Priodontes maximus</i>       | 2017 | MS/Pantanal                       | <i>T. rangeli</i> E | MN649020              |
| LBT 6705          | <i>Canis familiaris</i>         | 2015 | RJ/Atlantic Forest                | <i>T. rangeli</i> E | MN661344              |
| LBT 6706          | <i>Canis familiaris</i>         | 2015 | RJ/Atlantic Forest                | <i>T. rangeli</i> E | MN661345              |

<sup>a</sup> sequence from previous studies.

<sup>b</sup> samples from the same specimen collected in different periods of time.

Brazilian states: AC - Acre, AM - Amazonas, CE - Ceará, ES - Espírito Santo, MA - Maranhão, MS - Mato Grosso do Sul, PA - Pará, RJ - Rio de Janeiro.

Table S2: Two-tailed t-tests of paired average samples of *Trypanosoma rangeli* infection in mammals.

|                            | Infected    | Total       |
|----------------------------|-------------|-------------|
| Mean                       | 3,8         | 92,8        |
| Variance                   | 38,31428571 | 12414,88571 |
| Observations               | 15          | 15          |
| Pearson's Correlation      | 0,17092652  |             |
| Mean difference hypothesis | 0           |             |
| G1                         | 14          |             |
|                            | -           |             |
| Stat t                     | 3,118499881 |             |
| P(T<=t) two-tail           | 0,007549767 |             |
| critical two-tail t        | 2,144786688 |             |

Table S3: Two-tailed t-test of two samples of *Trypanosoma rangeli* infection assuming different variances.

|                            | Infected    | Total       |
|----------------------------|-------------|-------------|
| Mean                       | 3,8         | 92,8        |
| Variance                   | 38,31428571 | 12414,88571 |
| Observations               | 15          | 15          |
| Mean difference hypothesis | 0           |             |
| G1                         | 14          |             |
|                            | -           |             |
| Stat t                     | 3,088838165 |             |
| P(T<=t) two-tail           | 0,008007961 |             |
| critical two-tail t        | 2,144786688 |             |

Table S4: Trypanosomatid SSU rDNA sequences retrieved from GenBank used for phylogenetic analysis

| Sample                              | Location    | Host                         | GenBank accession number |
|-------------------------------------|-------------|------------------------------|--------------------------|
| <b><i>Trypanosoma rangeli</i> A</b> |             |                              |                          |
| San Augustin*                       | Colombia    | <i>Homo sapiens</i>          | AJ012417                 |
| Coachi                              | Colombia    | <i>Rhodnius prolixus</i>     | AJ012414                 |
| Palma-2                             | Venezuela   | <i>Rhodnius prolixus</i>     | AY491741                 |
| <b><i>Trypanosoma rangeli</i> B</b> |             |                              |                          |
| Legeri10*                           | Brazil      | <i>Tamandua tetradactyla</i> | AY491769                 |
| AM80*                               | Brazil      | <i>Homo sapiens</i>          | AY491766                 |
| Preguici*                           | Brazil      | <i>Choloepus didactylus</i>  | AY491767                 |
| AM11*                               | Brazil      | <i>Homo sapiens</i>          | AY491758                 |
| Legeri32*                           | Brazil      | <i>Tamandua tetradactyla</i> | AY491759                 |
| 4176*                               | Brazil      | <i>Rhodnius brethesi</i>     | EF071580                 |
| TryCC207*                           | Brazil      | <i>Cebuella pygmaea</i>      | AY491752                 |
| TryCC194*                           | Brazil      | <i>Cebuella pygmaea</i>      | AY491753                 |
| TryCC233*                           | Brazil      | <i>Saguinus l. labiatus</i>  | AY491756                 |
| TryCC238*                           | Brazil      | <i>Saguinus l. labiatus</i>  | AY491754                 |
| TryCC236*                           | Brazil      | <i>Saguinus f. weddelli</i>  | AY491755                 |
| TryCC205*                           | Brazil      | <i>Aotus sp</i>              | AY491757                 |
| TryCC416*                           | Brazil      | <i>Alouatta stramineus</i>   | AY491760                 |
| TryCC427*                           | Brazil      | <i>Callicebus lugens</i>     | AY491751                 |
| <b><i>Trypanosoma rangeli</i> C</b> |             |                              |                          |
| PG*                                 | Panama      | <i>Homo sapiens</i>          | AJ012416                 |
| RGB                                 | Venezuela   | <i>Canis familiaris</i>      | AJ009160                 |
| 1625                                | El Salvador | <i>Homo sapiens</i>          | AY491738                 |

|                                           |            |                                  |          |
|-------------------------------------------|------------|----------------------------------|----------|
| <b><i>Trypanosoma rangeli</i> D</b>       |            |                                  |          |
| <b>SC58*</b>                              | Brazil     | <i>Echimys dasythrix</i>         | AY491745 |
| <b><i>Trypanosoma rangeli</i> E</b>       |            |                                  |          |
| <b>TryCC643*</b>                          | Brazil     | <i>Platyrrhinus lineatu</i>      | FJ900242 |
| <b>TCC900</b>                             | Brazil     | <i>Rhodnius pictipes</i>         | KT368799 |
| <b>Outgroup species</b>                   |            |                                  |          |
| <b><i>Trypanosoma conorhini</i> USP</b>   | Brazil     | <i>Rattus rattus</i>             | AJ012411 |
| <b><i>Trypanosoma</i> sp. NanDoum1</b>    | Cameroon   | <i>Nandinia binotata</i>         | FM202492 |
| <b><i>Trypanosoma</i> sp. HochNdi1</b>    | Cameroon   | <i>Cercopithecus nictitans</i>   | FM202493 |
| <b><i>T. vespertilionis</i> P14</b>       | England    | <i>Pipistrellus pipistrellus</i> | AJ009166 |
| <b><i>Trypanosoma</i> sp.</b>             | Gabon      | <i>Rousettus aegyptiacus</i>     | AJ012418 |
| <b><i>Trypanosoma wauwau</i> CBT68</b>    | Brazil     | <i>Pteronotus parnellii</i>      | KR653210 |
| <b><i>Trypanosoma wauwau</i> BMC 1069</b> | Brazil     | <i>Pteronotus parnellii</i>      | KR653211 |
| <b><i>Trypanosoma</i> sp. G8</b>          | Australia  | <i>Bettongia</i> sp.             | KC753537 |
| <b><i>Trypanosoma noyesi</i> H25</b>      | Australia  | <i>Macropus giganteus</i>        | AJ009168 |
| <b><i>T. livingstonei</i> 1304</b>        | Mozambique | <i>Rhinolophus landeri</i>       | KF192983 |
| <b><i>T. livingstonei</i> 1953</b>        | Mozambique | <i>Hipposideros caffer</i>       | KF192984 |

\*Sequences used in the haplotype network analysis of *T. rangeli* lineage B intra-specificity.

**Figure S1: Representative 2% agarose gel electrophoresis of 18S rDNA molecular markers for *Trypanosoma rangeli* molecular identification.** The 2% agarose gel was stained with ethidium bromide, and 100 base-pair ladders were used: A) PCR product (~850 bp) for the V7-V8 region; B) PCR products for the SSU rDNA (~600 bp).

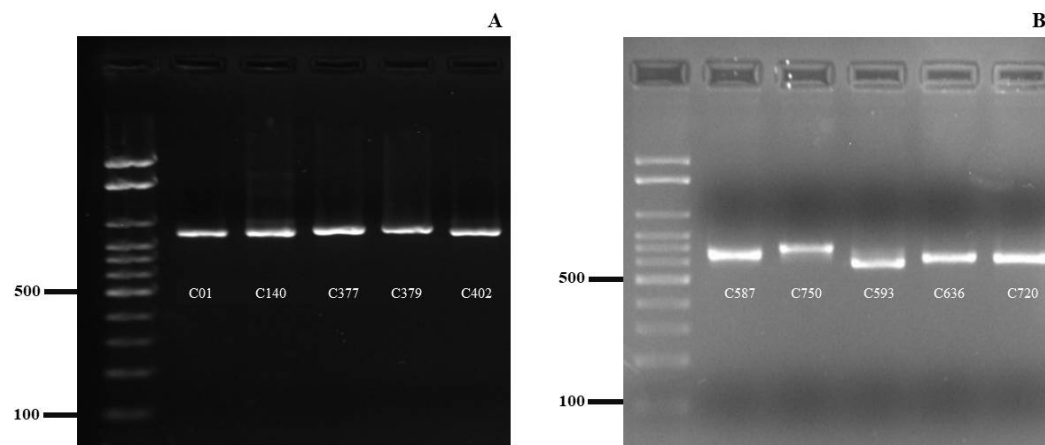

Supplement: s1 [file s1]
